# Supplementary material
Source: Springer Nature journal article supplement (https://www.springermedizin.de/resource/supplementary/13054_2009_8332_MOESM4_ESM.pdf/9731728)

**Exposure Definition**      **N**      **1-year Adjusted MRR (95% CI)****Statin Use**

|                            |       |                  |
|----------------------------|-------|------------------|
| Current Users              | 12483 | 0.79 (0.73-0.87) |
| New Users                  | 12483 | 0.80 (0.65-0.98) |
| Long-term Users            | 12483 | 0.81 (0.74-0.89) |
| Former Users               | 12483 | 0.97 (0.84-1.12) |
| Other Lipid Lowering Drugs | 12483 | 0.99 (0.65-1.52) |

**Types of Statins**

|               |       |                  |
|---------------|-------|------------------|
| Simvastatin   | 12483 | 0.77 (0.70-0.85) |
| Atorvastatin  | 12483 | 0.90 (0.72-1.12) |
| Pravastatin   | 12483 | 1.03 (0.81-1.31) |
| Other Statins | 12483 | 0.95 (0.67-1.35) |

**Subgroup Analyses (Exposure: Current Statin Use)****Charlson Score**

|        |      |                  |
|--------|------|------------------|
| Low    | 3846 | 0.70 (0.53-0.91) |
| Medium | 5142 | 0.79 (0.69-0.91) |
| High   | 3495 | 0.83 (0.73-0.94) |

**Discharge Diagnosis**

|              |      |                  |
|--------------|------|------------------|
| Infection    | 296  | 0.94 (0.59-1.52) |
| Cancer       | 1770 | 0.87 (0.68-1.12) |
| Diabetes     | 159  | 0.74 (0.28-1.98) |
| Card. Dis.   | 3628 | 0.84 (0.73-0.98) |
| Resp. Dis.   | 1181 | 0.82 (0.61-1.11) |
| Gast. Dis.   | 1350 | 0.79 (0.61-1.02) |
| Trauma/Pois. | 1519 | 0.55 (0.36-0.85) |
| Other        | 2580 | 0.79 (0.66-0.96) |

**Further Subgrouping**

|                                 |       |                  |
|---------------------------------|-------|------------------|
| Patients w/o Cancer             | 10713 | 0.78 (0.71-0.86) |
| Patients w. Diab. or Card. Dis. | 3787  | 0.84 (0.72-0.97) |
| Mechanical Ventilation          | 5817  | 0.79 (0.70-0.90) |
| Renal Replacement Therapy       | 1090  | 0.91 (0.74-1.12) |
| Medical Departments             | 5014  | 0.87 (0.76-0.98) |
| Surgical Departments            | 7469  | 0.75 (0.66-0.85) |

**Surgical Procedure**

|            |      |                  |
|------------|------|------------------|
| No Surgery | 6956 | 0.78 (0.69-0.87) |
| Surgery    | 5527 | 0.82 (0.72-0.95) |

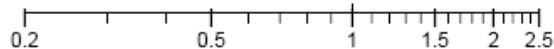

Supplement: MOESM4 [file 9731728]
